# Supplementary material
Source: publisher site journal article supplement (https://www.dovepress.com/article/507872)
Supplement: Supplementary file 1 [file get_supplementary_file.php]

Supplementary table 1 Sociological Data

| Item | Options | Frequency | Frequency(%) | Cumulative Percentage(%) |
| --- | --- | --- | --- | --- |
| Gender | Male | 149 | 48.38 | 48.38 |
| Female | 159 | 51.62 | 100 |
| Age Group(years) | 41-45 | 86 | 27.92 | 27.92 |
| 46-50 | 66 | 21.43 | 49.35 |
| 51-55 | 80 | 25.97 | 75.32 |
| 56-60 | 76 | 24.68 | 100 |
| Marital Status | Single | 71 | 23.05 | 23.05 |
| Married | 197 | 63.96 | 87.01 |
| Other | 40 | 12.99 | 100 |
| Place of residence | Town | 242 | 78.57 | 78.57 |
| Village | 66 | 21.43 | 100 |
| Occupation type | Farming | 15 | 4.87 | 4.87 |
| Employed | 82 | 26.62 | 31.49 |
| Self-employed | 90 | 29.22 | 60.71 |
| Retired | 23 | 7.47 | 68.18 |
| Other | 98 | 31.82 | 100 |
| Education level | Junior high school and below | 65 | 21.1 | 21.1 |
| High school or technical | 67 | 21.75 | 42.86 |
| College degree or above | 176 | 57.14 | 100 |
| Per capital monthly income of the family（RMB） | ＜5000 | 104 | 33.77 | 33.77 |
| 5,000-10,000 | 140 | 45.45 | 79.22 |
| ＞10,000 | 64 | 20.78 | 100 |
| Source of medical expenses | Rural cooperative medical care | 39 | 12.66 | 12.66 |
| Employee medical insurance | 181 | 58.77 | 71.43 |
| Resident medical insurance | 51 | 16.56 | 87.99 |
| Self-paid | 37 | 12.01 | 100 |
| Religious beliefs | Yes | 109 | 35.39 | 35.39 |
| No | 199 | 64.61 | 100 |
| Number of pulmonary nodules | 1 | 83 | 26.95 | 26.95 |
| ＞1 | 225 | 73.05 | 100 |
| Smoking history | Yes | 239 | 77.6 | 77.6 |
| No | 69 | 22.4 | 100 |
| Family history of lung cancer | Yes | 85 | 27.6 | 27.6 |
| No | 223 | 72.4 | 100 |
| Total | | 308 | 100 | 100 |

Supplementary table 2 Pearson Correlation（Total Score）

|  | | | | | | | |
| --- | --- | --- | --- | --- | --- | --- | --- |
|  | *M* | *SD* | 1 | 2 | 3 | 4 | 5 |
| 1.Intolerance of uncertainty | 33.779 | 14.057 | 1 |  |  |  |  |
| 2.Negative interpretation bias | 68.458 | 24.76 | 0.179** | 1 |  |  |  |
| 3.Trust | 27.756 | 11.912 | -0.173** | -0.164** | 1 |  |  |
| 4.Treatment adherence to follow-up | 18.601 | 6.997 | -0.427** | -0.268** | 0.388** | 1 |  |
| 5.Self-compassion | 85.256 | 27.626 | -0.008 | 0.002 | 0.278** | 0.128* | 1 |

Note:* p<0.05 ** p<0.01

Supplementary table 3 Pearson Correlation(Average Score of Each Item)

|  | | | | | | | |
| --- | --- | --- | --- | --- | --- | --- | --- |
|  | *M* | *SD* | 1 | 2 | 3 | 4 | 5 |
| 1.Intolerance of uncertainty | 2.815 | 1.172 | 1 |  |  |  |  |
| 2.Negative interpretation bias | 3.112 | 1.126 | 0.179** | 1 |  |  |  |
| 3.Trust | 2.776 | 1.191 | -0.173** | -0.165** | 1 |  |  |
| 4.Treatment adherence to follow-up | 3.72 | 1.399 | -0.427** | -0.268** | 0.388** | 1 |  |
| 5.Self-compassion | 3.279 | 1.062 | -0.009 | 0.002 | 0.278** | 0.128* | 1 |

Note:* p<0.05 ** p<0.01
